## **Morphogen and community effects determine cell fates in response to BMP4 signaling in human embryonic stem cells**

**Anastasiia Nemashkalo<sup>1</sup>, Albert Ruzo<sup>2</sup>, Idse Heemskerk<sup>1</sup>, and Aryeh Warmflash<sup>1,3,\*</sup>**

### **Affiliations:**

<sup>1</sup>Department of Biosciences and <sup>3</sup>Department of Bioengineering, Rice University, Houston, TX 77005.

<sup>2</sup>Laboratory of Stem Cell Biology and Molecular Embryology, The Rockefeller University, New York, New York 10065

\* Correspondence to AW: [aryeh.warmflash@rice.edu](mailto:aryeh.warmflash@rice.edu).

## **Abstract:**

Paracrine signals maintain developmental states and create cell-fate patterns in vivo, and influence differentiation outcomes in human embryonic stem cells (hESCs) in vitro. Systematic investigation of morphogen signaling is hampered by the difficulty of disentangling endogenous signaling from experimentally applied ligands. Here, we grow hESCs in micropatterned colonies of 1-8 cells (“ $\mu$ Colonies”) to quantitatively investigate paracrine signaling and the response to external stimuli. We examine BMP4-mediated differentiation in  $\mu$ Colonies and standard culture conditions and find that in  $\mu$ Colonies, above a threshold concentration, BMP4 gives rise to only a single cell fate, contrary to its role as a morphogen in other developmental systems. Under standard culture conditions, BMP4 acts as morphogen, but this effect requires secondary signals and particular cell densities. We further find that a “community effect” enforces a common fate within  $\mu$ Colonies both in the state of pluripotency and when cells are differentiated, and that this effect allows more precise response to external signals. Using live cell imaging to correlate signaling histories with cell fates, we demonstrate that interactions between neighbors result in sustained, homogenous signaling necessary for differentiation.

**Keywords:** human embryonic stem cells, micropatterning, BMP4 pathway, differentiation mechanisms

**Summary Statement** (15-30 words): We quantitatively examined signaling and differentiation in hESC colonies of varying size treated with BMP4. Depending on the cell density, secondary signals result in both morphogen or community effects.

## 1 **Introduction**

2 Morphogen signaling pathways control cell fate during embryonic development, and can  
3 be manipulated to produce particular fate outcomes in human embryonic stem cells (hESCs).  
4 During development, all signals both originate from, and are received by, the cells of the  
5 embryo, however, cultured cells combine extrinsic influences from the culture medium with  
6 endogenous signals passed between cells. In hESCs, secondary signals often perturb the outcome  
7 of directed differentiation (Kurek et al., 2015; Warmflash et al., 2014; Yu et al., 2011). Whether  
8 endogenous signals are required to maintain particular states, such as the pluripotent state, or to  
9 ensure the robustness of differentiation into coherent territories has not been investigated in  
10 hESCs. Dissecting the effects of paracrine signals from responses to external stimuli would  
11 enable researchers to harness endogenous signals to achieve particular aims, and aid in dissecting  
12 the role of these signals in the developing embryo.

13 The BMP pathway is a conserved morphogen signaling pathway that regulates dorsal-  
14 ventral patterning in species from flies to mammals (Bier and De Robertis, 2015) and has also  
15 been shown to be essential for mammalian gastrulation (Arnold and Robertson, 2009; Winnier et  
16 al., 1995). However, the difficulty in obtaining quantitative data has prevented determining  
17 whether BMP functions as a morphogen during mammalian gastrulation. Interestingly, in hESCs,  
18 there is increasing evidence that treatment with BMP4 leads to trophectodermal (Horii et al.,  
19 2016; Li et al., 2013; Xu et al., 2002) and mesodermal fates (Kurek et al., 2015; Warmflash et  
20 al., 2014; Yu et al., 2011), and that the mesodermal fates may be lost when Wnt, Nodal, or FGF  
21 signaling is inhibited. When colony geometries are controlled, BMP4 can trigger formation of  
22 patterns containing trophectoderm and all three embryonic germ layers (Etoc et al., 2016;  
23 Warmflash et al., 2014). These patterns arise in response to homogeneous treatment with BMP4  
24 because of secondary paracrine signals that are required for producing and positioning the  
25 mesodermal territories (Warmflash et al., 2014). Under these culture conditions in which  
26 cells are housed within large colonies, it is difficult to disentangle the direct response to the BMP  
27 signal from the effects of interactions between the cells, and the role of BMP in directing  
28 differentiation to particular fates has remained controversial (Bernardo et al., 2011). It is  
29 therefore unclear whether the different fates induced by BMP4 treatment depend on the dose of

30 BMP4 and, if so, if cells directly read the BMP4 concentration. Quantitative dissection of the  
31 cellular response to supplied BMP4 as well as any paracrine interactions that function in the state  
32 of pluripotency or during BMP4-mediated differentiation could resolve these important issues.

33 Here we use a micropatterning approach to isolate the effects of BMP treatment from the  
34 secondary endogenous signals that are active both in the state of pluripotency and during BMP-  
35 mediated differentiation. To do so, we confined cells to very small colonies ranging from one to  
36 eight cells (from here on referred to as  $\mu$ Colonies), allowing us to compare isolated cells, which  
37 respond only to the exogenous signaling, with cells housed within increasing large colonies  
38 where the contribution of paracrine signaling increases. Our results show that, in this context,  
39 BMP4 does not act as morphogen but instead functions as a switch and, above a threshold,  
40 induces only the trophoctodermal fate. In contrast, in standard culture conditions in which  
41 colonies may consist of hundreds or thousands of cells, BMP4 elicits both mesodermal and  
42 trophoctodermal fates in a dose-dependent manner that also requires Nodal signaling and  
43 particular cell densities. Further, we find the main effect of secondary signals on the short length  
44 scales in  $\mu$ Colonies is to enforce a common fate within the colony. This enforcement allows cells  
45 to more faithfully remain pluripotent in conditions supporting this state and to differentiate  
46 sensitively and homogenously in response to external stimuli. We show that this enforcement is  
47 the result of more sustained BMP signaling in larger colonies sizes, and that in standard culture  
48 conditions, the outcome of BMP mediated differentiation correlates with the duration of the  
49 BMP signal rather than the initial response.

## 50 **Results**

51 **BMP4 produces nearly pure populations of trophoctodermal cells in  $\mu$ Colonies.** We first  
52 optimized cell seeding such that nearly all  $\mu$ Colonies contain between 1 and 8 cells (Fig. 1A,B).  
53 Cells in  $\mu$ Colonies grown for 42 hours in the pluripotency supporting media MEF-CM expressed  
54 the pluripotency markers SOX2, OCT4, and NANOG (Fig. S1 A-C). In the experiments below,  
55 we used SOX2 protein expression levels as a marker for hESC pluripotency but show that Nanog  
56 obeys similar trends (see Fig. S2). We next assayed the response of  $\mu$ Colonies to a range of  
57 BMP4 concentrations (0.1-30 ng/ml for 42 hours).

58 In response to increasing BMP4 levels, cells within  $\mu$ Colonies transitioned from pluripotent  
59 (SOX2+) to a differentiated fate expressing CDX2 and GATA3 and lacking expression of

60 BRACHYURY, SOX17, EOMES, NANOG and SOX2 (Fig. S1D-F and Fig. 1C). Consistent  
61 with a growing body of literature on BMP4-mediated differentiation (Horii et al., 2016; Li and  
62 Parast, 2014; Xu et al., 2002), we identify these cells as trophoctoderm, and below we use CDX2  
63 as a marker for this fate. Besides CDX2 and GATA3, all other differentiation markers were  
64 detected in less than 2% of cells in the population, and in all conditions, nearly the entire  
65 population of cells expressed either the SOX2 marker of pluripotency or the CDX2  
66 differentiation marker. We detected almost no BRA<sup>+</sup> cells at any dose (Fig. 1C). BMP4 doses of  
67 0.1 - 0.3 ng/ml produced mixtures of SOX2<sup>+</sup> and CDX2<sup>+</sup> cells while those at 1 ng/ml or higher  
68 yielded nearly pure populations of CDX2<sup>+</sup> with complete downregulation of SOX2 expression  
69 (Fig. 1D). In contrast, previous literature has shown that larger colonies differentiate to a  
70 heterogeneous mixture of fates even in response to much higher doses of BMP4 (Tang et al.,  
71 2012; Warmflash et al., 2014). These results establish that cells in  $\mu$ Colonies differentiate more  
72 sensitively and homogenously than cells in standard-sized colonies in response to BMP4 ligand,  
73 and suggest that arrays of small colonies like the ones we employ here may have utility in  
74 directed differentiation schemes.

75 **In standard culture, BMP elicits a morphogen effect that depends on Nodal signaling and**  
76 **cell density.** To better understand the lack of mesodermal differentiation in  $\mu$ Colonies, we  
77 compared the differentiation outcomes in response to a similar range of BMP4 doses for cells  
78 grown without confinement to small colonies. We seeded cells such that the density was  
79 homogenous throughout the culture dish and varied this density (see below). We observed a  
80 morphogen effect in that the cell fate depended on the concentration of BMP4. Below 2 ng/ml  
81 BMP4, cells remained in the SOX2<sup>+</sup> pluripotent state, at 2-4 ng/ml cells differentiated to BRA<sup>+</sup>  
82 mesodermal cells, while at higher doses cells primarily adopted a CDX2<sup>+</sup>BRA<sup>-</sup>  
83 trophoctodermal fate (Fig. 2A top row, Fig. 2B and Fig. S3A-C).

84 If cells directly read the BMP4 concentration, inhibitors of other signaling pathways  
85 should not perturb the morphogen effect. We found that treatment with the Activin/Nodal  
86 signaling inhibitor SB431542 abolished mesoderm differentiation at all doses so that cells  
87 switched between only the SOX2<sup>+</sup> and CDX2<sup>+</sup> fates as in  $\mu$ Colonies (Fig. 2A bottom row, Fig.  
88 2C, Fig. S3D). This supports the idea that the morphogen effect in response to BMP4 requires  
89 secondary signals. We next reasoned that the response to secondary signals should be density

90 dependent, and examined the role of cell density in differentiation outcomes. Indeed at the dose  
91 of peak BRA induction (2 ng/ml), we only observed BRA-expression at 30 and 60 x 10<sup>3</sup>  
92 cells/cm<sup>2</sup> but not at lower or higher densities (Fig. 2D, Fig. S3E). At higher BMP4 doses, cells  
93 did not express BRA at any cell density but primarily expressed CDX2 at low densities and  
94 SOX2 at high densities (Fig. 2E, Fig. S3F). Note that at both 2 and 10 ng/ml BMP4 at high  
95 densities, cells failed to differentiate and remained SOX2+, consistent with other reports that  
96 BMP signaling and differentiation are inhibited at high cell densities (Etoc et al., 2016). Thus,  
97 taken together, our results support a model where only the CDX2 fate is a direct consequence of  
98 BMP4 signaling. Mesodermal differentiation can also result at particular doses, but it requires  
99 secondary signaling through the Activin/Nodal pathway, and is only induced at particular cell  
100 densities. This likely explains why we did not observe mesodermal differentiation at any BMP4  
101 dose in  $\mu$ Colonies, as cell numbers in  $\mu$ Colonies are likely too low to produce sufficient  
102 secondary signals to induce mesodermal fates.

103 **A community effect enforces a common fate within  $\mu$ Colonies in both pluripotent and**  
104 **differentiation states.** We noted that in the  $\mu$ Colony experiments above, even at BMP4  
105 concentrations that produced mixtures of different fates (CDX2+ or SOX2+), the fates of cells  
106 within an individual colony were highly correlated, while neighboring colonies often differed in  
107 fate, suggesting reinforcement of a common fate within the  $\mu$ Colony (Fig. 1D), a phenomenon  
108 referred to as the community effect (Bolouri and Davidson, 2010; Gurdon, 1988). To better  
109 understand this result, we examined the expression of the SOX2 and CDX2 markers as a  
110 function of number of cells in the colony at varying BMP4 doses. Interestingly, under  
111 pluripotency supporting conditions, expression of the pluripotency marker SOX2 increased with  
112 colony size, while under differentiation conditions, expression of SOX2 decreased with colony  
113 size. The differentiation marker CDX2 showed opposite trends: expression decreased with  
114 colony size in pluripotency conditions but increased with colony size when differentiated with  
115 BMP4 (Fig. 1E-H and Fig. 3A-C). Comparing histograms of expression levels in cells grown  
116 under pluripotency conditions, we found that the one-cell colonies showed a second population  
117 of cells with reduced SOX2 and enhanced CDX2 and that this population was absent in larger  
118 colonies (Fig. 3B). This suggests that a fraction of cells spontaneously differentiate to a distinct  
119 state and that this differentiation only occurs in colonies with small numbers of cells. We also  
120 found similar distributions revealing distinct subpopulations of differentiated and

121 undifferentiated one-cell colonies in differentiation conditions but with the opposite trend:  
122 pluripotent cells only persisted in colonies with smaller numbers of cells (Fig. S4A-B). This  
123 second population of cells becomes increasingly rare as the colony size increases (Fig. 3C,  
124 experimental data). We also confirmed this community effect in a second hESC line (Fig.  
125 S4C,D) and that it does not depend on the presence of ROCK-inhibitor in the culture media (Fig.  
126 S4E,F).

### 127 **A simple statistical-mechanical model quantitatively accounts for the community effect.**

128 The experiments above show that in the  $\mu$ Colony system cells can be in one of two states –  
129 pluripotent (SOX2+) or trophectodermal (CDX2+). Interactions between cells enforce a common  
130 fate inside the colony, while externally supplied BMP4 can bias that common fate towards the  
131 CDX2+ state. To explore whether these simple features are sufficient to explain the system's  
132 behavior quantitatively, we exploited an analogy with the Ising model used in statistical physics  
133 to describe a two-state system of atomic spins that are coupled to their neighbors and respond to  
134 an external field. We made the simplifying assumption that every cell is coupled to every other  
135 within a  $\mu$ Colony, which is justified by the small colony sizes, and the extensive cell movements  
136 we observe in the timelapse experiments below. We assume that the strength of the coupling  
137 between cells ( $J$ ) is the same for every BMP4 concentration and that the bias towards the CDX2  
138 fate ( $B$ ) increases with concentration (See Supplemental Information). The data for the fraction  
139 of cells in each subpopulation as a function of colony size at different BMP4 concentrations was  
140 well fit with this simple model (Fig. 3C, black curves). Further, other data not used in fitting the  
141 model, such as the distribution of fates within  $\mu$ Colonies of a particular size were predicted by  
142 the model without further adjustment to the parameters (Fig. S5). Taken together, these results  
143 suggest that within  $\mu$ Colonies BMP4 mediated differentiation can be quantitatively explained by  
144 only two features – the bias of differentiation towards the trophectodermal fate by BMP4 and the  
145 coupling between neighboring cells that causes them to adopt the same fate.

146 **Differences in proliferation do not explain the community effect.** A simple hypothesis that  
147 would partially explain the observed community effect is that some cells are already  
148 differentiated upon seeding. If these cells also do not proliferate, then we would expect to see the  
149 differentiated cells in smaller colonies. This hypothesis would predict differences in cell cycle as  
150 a function of colony size. That is, cells in smaller colonies would be more likely to be arrested in

151 the G1 phase of the cell cycle. To test this hypothesis, we first analyzed the integrated DAPI  
152 intensity as a proxy for the total DNA content of the cells, and found that it did not vary with  
153 colony size in either pluripotent or differentiation conditions (Fig. 4A). We next created cells  
154 expressing RFP-Cdt1, a component of the FUCCI system that is expressed only in the G1 phase  
155 (Sakaue-Sawano et al., 2008). No differences in the fraction of cells in G1 phase were observed  
156 between colonies of different sizes in either pluripotent or differentiation conditions (Fig. 4B).  
157 These results establish that cell cycle differences do not explain the colony size dependence in  
158 either pluripotency or differentiation. We note that the hypothesis that cell cycle differences  
159 underlie the community effect also could not explain our results in the differentiated state where  
160 cells expressing pluripotency markers only persist in small colonies. Instead, we favor the  
161 interpretation that single cells less robustly interpret the supplied signals than small colonies do  
162 (see below). We also investigated whether the community effect could be affected by modulating  
163 the pluripotency-maintaining Activin/Nodal and FGF pathways (Fig. S6) or inhibiting the  
164 differentiation promoting Wnt and BMP pathways (Fig. S7), but we did not observe significant  
165 differences in the community effect in any of these cases.

166 **During differentiation in  $\mu$ Colonies, enforcement of sustained signaling underlies the**  
167 **community effect.** We next turned to understanding the community effect observed during  
168 BMP-mediated differentiation using a reporter cell line for the BMP signaling pathway. We used  
169 CRISPR/Cas9 genome engineering to insert GFP at the endogenous locus to form an N-terminal  
170 fusion with SMAD4, and isolated a clonal line with a heterozygous insertion of GFP (Fig. S8).  
171 Similar fusions have been shown to be faithful reporters of Smad signaling in the past  
172 (Schmierer and Hill, 2005; Sorre et al., 2014; Warmflash et al., 2012). In undifferentiated cells,  
173 GFP-Smad4 localizes to the cytoplasm and translocates to the cell nucleus upon stimulation with  
174 BMP4 (Fig. 5A). To increase statistical power, we seeded reduced numbers of cells and focused  
175 only on the difference between 1 and 2 cell colonies. We performed live imaging and quantified  
176 the BMP signaling response by measuring the nuclear to cytoplasmic ratio of GFP-Smad4 during  
177 differentiation induced by 10 ng/ml BMP4 (Fig. 5A,B and Movie S1).

178 The reporter revealed similar signaling intensities in 1 and 2 cell colonies before BMP4  
179 stimulation and in the early response to the ligand up to 10 hours after stimulation. Thereafter,  
180 the mean trajectories began to diverge with the two-cell colonies showing higher signaling (Fig.



181 5C). Examining the distribution of signals in individual cells, we found that this divergence in  
182 the mean is mostly due to the presence of one cell colonies that revert to near baseline levels of  
183 signaling, while this does not occur in two-cell colonies (Fig. 5D,F). Thus, we hypothesized that  
184 cells without sustained signaling will fail to differentiate to CDX2<sup>+</sup> cells while the high  
185 signaling cells will differentiate.

186 To test this hypothesis directly, we performed live-cell imaging of one-cell colonies and  
187 then fixed these colonies and analyzed their levels of CDX2. We defined cells as low or high  
188 signaling depending on whether their temporal average overlapped with the distribution of  
189 signaling before stimulation. We found that 75% of high signaling cells but only 31% of low  
190 signaling cells differentiated to a CDX2<sup>+</sup> cell fate (Fig. 5G). Differences in the mean signaling  
191 intensities between CDX2 positive and negative cells became evident after the early phase of  
192 response, similar to the differences between one and two cell colonies (Fig. 5H). These data are  
193 consistent with a mechanism by which cell-cell interactions serve to maintain the BMP signaling  
194 response, perhaps by directly activating the BMP4 gene (Karaulanov et al., 2004; Schuler-Metz  
195 et al., 2000), and thereby enforce differentiation to trophectodermal fates. One-cell colonies that  
196 lack this reinforcement both signal and differentiate more heterogeneously.

197 **During differentiation in standard culture conditions, sustained signaling is required for**  
198 **differentiation into CDX2 fate.** To investigate the relationship between BMP signaling  
199 dynamics and differentiation more generally, we performed dose response experiments under  
200 standard culture conditions using the same GFP-Smad4 cell line. At each dose, we measured the  
201 BMP signaling dynamics and then fixed the same cells and analyzed their differentiation to  
202 CDX2<sup>+</sup> trophectoderm. To avoid the complications of cells adopting multiple fates, we cultured  
203 the cells with SB431542 in order to prevent mesodermal differentiation. Interestingly, in the  
204 range of 1-10 ng/ml BMP4, the initial response to ligand stimulation was identical and the  
205 trajectories only diverged at later time points with 1 ng/ml showing significant decay of the  
206 signal and 3 ng/ml showing a small decay as compared to the cells at 10 ng/ml (Fig. 6A-B).  
207 These trends were mirrored in the differentiation data, cells at 1 ng/ml largely failed to express  
208 CDX2 while those at 3 ng/ml expressed it almost as highly as those at 10 ng/ml (Fig. 6C). Since  
209 the initial signaling response was the same in all cases, these data demonstrate that the  
210 maintenance of signaling, rather than the magnitude of the initial response, is the determining  
211 factor for whether cells will differentiate in response to BMP4.

## 212 Discussion

213 Here we introduce a  $\mu$ Colony system that allowed us to separately study exogenous and  
214 paracrine signaling in hESCs quantitatively and with cellular resolution. We show that  
215 endogenous signals enforce a common fate within the colony both in pluripotent conditions and  
216 when differentiated with BMP4. This enforcement of a common fate allows larger  $\mu$ Colonies to  
217 respond more robustly to signals supplied in the growth media: sustaining pluripotency in  
218 pluripotency supporting media and differentiating sensitively and homogeneously in response to  
219 the extrinsic differentiation signal. We show that under standard culture conditions, BMP4 acts  
220 as a morphogen, inducing different fates in a concentration dependent-manner, while in  
221  $\mu$ Colonies it switches cells from pluripotent to a single fate, trophectoderm, when supplied above  
222 a threshold. This apparent discrepancy is due to the need for secondary signals to produce the  
223 morphogen effect in standard culture conditions, and  $\mu$ Colonies do not reach sufficient densities  
224 to produce these secondary signals. We developed a mathematical model which shows that the  
225 detailed statistics regarding the number of cells in the pluripotent or trophectodermal fate as a  
226 function of colony size can be predicted from only two parameters: the strength of the bias  
227 towards the trophectodermal fates by BMP4 and the strength the interactions between cells that  
228 enforce a common fate.

229 The enforcement of a common fate and greater sensitivity to external signals was  
230 observed in the induction of *Xenopus* animal cap cells to muscle fates by vegetal cells by Gurdon  
231 who termed this phenomenon the “community effect” (Gurdon, 1988). This work showed that  
232 individual animal cap cells inserted between two pieces of vegetal tissue failed to differentiate, in  
233 contrast to larger aggregates that were induced to muscle fates. This suggested that interactions  
234 between the animal cap cells are required to robustly interpret the mesoderm differentiation  
235 signals emanating from the vegetal cells. More recently, Bolouri and Davidson proposed that  
236 positive feedback of a signal upon its own transcription could underlie the community effect and  
237 applied this idea to the maintenance of the oral ectoderm of the sea urchin embryo through  
238 induction of *nodal* gene expression by Nodal signaling (Bolouri and Davidson, 2010). Similarly,  
239 in this study, we find that the enforcement of sustained BMP signaling by interactions between  
240 the cells is necessary for ensuring that all cells within the colony adopt the same trophectodermal  
241 fate.

242           During development, the community effect serves to ensure a common fate over  
243 relatively short length scales, and thereby creates coherent territories of a single cell type.  
244 Previous work in hESCs has shown that as colony size is increased, cell-fate patterns emerge  
245 (Berge et al., 2008; Etoc et al., 2016; van den Brink et al., 2014; Warmflash et al., 2014). It is  
246 likely that the community effect plays a role in ensuring the coherence of local territories, but  
247 other phenomena must emerge on longer length scales to create these patterns. Future work on  
248 embryonic patterning with stem cells can probe this transition to understand the emergence of  
249 self-organized patterns.

250           Cells in  $\mu$ Colonies of sufficient size differentiate homogeneously in response to very low  
251 concentrations of ligand. Here, concentrations of 1 ng/ml induced nearly pure populations of  
252 CDX2+GATA3+ trophectoderm, whereas in larger colonies, nearly 100 fold greater  
253 concentrations induce a mixture of different fates (Tang et al., 2012; Warmflash et al., 2014).  
254 Thus,  $\mu$ Colonies seeded at appropriate densities may represent a platform for sensitive and  
255 robust directed differentiation.

256           Our results here suggest that only trophectodermal fates are directly induced from  
257 epiblast cells by BMP4, and that it does not directly induce multiple fates in a dose-dependent  
258 manner. Experiments with inhibiting secondary signals, modulating cell density, and comparing  
259  $\mu$ Colonies to standard culture, establish that there is an apparent morphogen effect in treating  
260 hESCs with BMP4, but that this is indirect, relying on secondary signals and only operating at  
261 particular cell densities. The role of BMP4 in initiating gastrulation and mesendoderm  
262 differentiation both in vivo (Winnier et al., 1995) and in vitro (Bernardo et al., 2011; Kurek et  
263 al., 2015; Warmflash et al., 2014; Yu et al., 2011) requires other signals and was not seen in our  
264 experiments at any BMP4 dose in  $\mu$ Colonies. Our data suggest that that  $\mu$ Colonies do not contain  
265 sufficient cell numbers to initiate the secondary signals such as Nodal and Wnt that operate  
266 during gastrulation in the mammalian embryo (Arnold and Robertson, 2009), and are important  
267 for patterning pluripotent cells in vitro (Berge et al., 2008; Warmflash et al., 2014).

268           It will be interesting to use the methods established here to examine whether these other  
269 developmental signaling pathways function directly as morphogens. In vivo evidence from  
270 genetic perturbations suggests that Nodal signaling induces multiple different fates in a dose-  
271 dependent manner during gastrulation (Dunn et al., 2004; Robertson, 2014), and the  $\mu$ Colony

272 system could determine whether this is a direct result of cells reading out the Nodal signal or  
273 whether other interactions are required. Similarly, as BMP4 has a documented role as a  
274 morphogen in dorsal ventral patterning (Ferguson and Anderson, 1992; Tucker et al., 2008;  
275 Wilson et al., 1997), it would be interesting to subject these systems to a similar analysis to  
276 determine if cells are directly reading the BMP4 concentration in these cases.

## 277 **Author Contributions**

278 A.N., I.H., and A.W. designed experiments. A.N. performed experiments. A.N., I.H., and A.W.  
279 performed analysis. A.W. supervised research. A. R. created the GFP-Smad4 cell line. A.N and  
280 A.W. wrote the paper.

## 281 **Materials and Methods**

282 **Cell Culture. Routine Culture.** For regular maintenance, hESCs were grown in mTeSR1 in  
283 tissue culture dishes coated with Matrigel overnight at 4°C (dilution 1:200 in DMEMF12). Cells  
284 were passaged using dispase every 3 days. Cells were tested for contamination. For imaging  
285 experiments under standard culture conditions, cells were seeded onto 8- or 4-well imaging  
286 slides (ibidi) at densities of  $\sim 63 \times 10^3$  cells per  $\text{cm}^2$ . For density dependent experiments, the  
287 densities were varied as indicated.

288 *Micropatterned experiments.* We used the micropatterning protocol described in detail in  
289 (Deglincerti et al., 2016) with adjusted cell numbers. Briefly, micropatterning experiments were  
290 performed using HUESM conditioned by mouse embryonic fibroblasts and supplemented with  
291 20ng/ml bFGF (Life Technologies). We will refer to this media as MEF-CM. The day before  
292 seeding onto micropatterns, the media was switched from mTeSR1 to MEF-CM. The next day, a  
293 single cell suspension was prepared using accutase, and  $5.5 \times 10^4$  cells in 2 ml of MEF-CM with  
294 Rock-Inhibitor Y27672 (10  $\mu\text{M}$ ; StemCell Technologies) were seeded onto the micropatterned  
295 coverslip. Custom-patterned glass coverslips (CYTOO) were placed in a 35 mm dish and coated  
296 with 2 ml of 5  $\mu\text{g/ml}$  Laminin-521 (LN521, Biolamina) in PBS (with calcium and magnesium)  
297 for two hours at 37°C. After two hours, LN521 was washed out via serial dilutions by adding 6  
298 ml PBS and removing 6 ml (6 dilutions). Then the remaining solution was removed entirely, and  
299 cells were placed onto the coverslip and incubated at 37°C. After several hours, the media was  
300 changed and the growth factors or small molecules added as indicated in the text.

301 *Reagents.* The following reagents were used to inhibit signaling pathways: Lefty (R & D  
302 Systems, 500 ng/mL), SB431542 (Fisher Scientific, 10  $\mu\text{M}$ ), PD0325901 (ESI-BIO, 1  $\mu\text{M}$ )

303 LDN-193189 (ESI-BIO, 200 nM), Y27672 (10 $\mu$ M, ESI-BIO) and IWP2 (EMD Millipore, 4  $\mu$ M).  
304 When increasing FGF levels, we used bFGF (Life Technologies, 100 ng/ml).

305 *Cell Lines.* All experiments in this work were performed with the hESC cell lines ESI017  
306 (ESIBIO) or RUES2 (A gift of Ali Brivanlou, Rockefeller). GFP-Smad4 cells were made from  
307 the parental RUES2 line by using CRISPR/Cas9 genome engineering to fuse a cassette  
308 containing a Puromycin resistance gene (PuroR), a t2a self-cleaving peptide, and GFP onto the  
309 N-terminus of Smad4 so that the locus produces both GFP-Smad4 and PuroR. Subsequently,  
310 cells were nucleofected with an ePiggyBac plasmid containing RFP-H2B driven by the CAG  
311 promoter and also containing a Blasticidin (Bsd) resistance gene (ePB-B-CAG-RFP-H2B). Cells  
312 were selected with 1  $\mu$ g/ml Puromycin and 5  $\mu$ g/ml Bsd. The Cdt1-RFP cell line was created by  
313 nucleofecting ESI017 cells with an ePiggyBac construct encoding RFP-Cdt1 driven by the CAG  
314 promoter and containing a Bsd resistance gene (ePB-B-CAG-RFP-Cdt1). Cells were selected  
315 with 5  $\mu$ g/ml Bsd.

316 *Immunostaining.* Coverslips were rinsed with PBS, fixed for 20 minutes using 4% PFA, rinsed  
317 twice with PBS, and blocked for 30 minutes at room temperature. The blocking solution  
318 contained 3% donkey serum and 0.1% Triton-X in 1X PBS. After blocking, the cells were  
319 incubated with primary antibodies at 4°C overnight (see Table S1). The next day the cells were  
320 washed three times with PBST (1X PBS with 0.1% Tween20) and incubated with secondary  
321 antibodies (AlexaFluor488 cat#A21206, AlexaFluor555 cat#A31570, cat#A21432 and  
322 AlexaFluor647 cat#A31571, dilution 1:500) and DAPI dye for 30 minutes at room temperature.  
323 After secondary antibody treatment, samples were washed twice in PBST at room temperature.  
324 Coverslips were then mounted in Fluoromount-G (Southern Biotech) and allowed to dry for  
325 several hours.

326 *Imaging.* Entire fixed coverslips were imaged using tiled acquisition with a 20X, NA 0.75  
327 objective on an Olympus IX83 inverted epifluorescence microscope. For live cell imaging  
328 RUES2-GFP-Smad4/RFP-H2B reporter cells were seeded on the micropattern as described  
329 above and the patterned coverslip was then moved into a holder (CYTOO) to allow for imaging  
330 through the coverslip without any intervening material. Images were acquired on an  
331 Olympus/Andor spinning disk confocal microscope with either a 40X NA 1.25 silicon oil  
332 objective or a 60X NA 1.35 oil objective. Approximately 4 z-planes were acquired at each  
333 position every 12-17 minutes. For live cell imaging in standard culture conditions, reporter cells

334 were seeded onto ibidi slides as described above and imaged on an Olympus FV12 Laser  
335 Scanning Confocal microscope with a 20X, NA 0.75 objective at time intervals of 20 minutes.  
336 We typically acquired 2-4 hours of data before BMP4 stimulation and 20-24 hours for  $\mu$ Colonies  
337 and 40 hours for standard culture conditions afterwards.

338 *Image analysis.* Images of fixed cells acquired at 20X on the epifluorescence microscope were  
339 segmented using custom software written in Matlab as described previously (Warmflash et al.,  
340 2012; Warmflash et al., 2014) . Identified cells were grouped into  $\mu$ Colonies based on the  
341 distance to their neighbors. Cells within 80 microns were considered to be within a single  
342  $\mu$ Colony. We visually inspected colony groupings for accuracy. Fluorescent intensities for each  
343 cell were quantified and intensities for markers were normalized to the intensity of the DAPI  
344 stain in each cell. All averages are taken over at least 100 cells. Images from live cell  
345 experiments were first processed in ilastik (<http://ilastik.org>) to create nuclear and cellular masks.  
346 Custom MATLAB software was used to postprocess these masks to separate touching cells and  
347 to quantify both nuclear and cytoplasmic intensities.

348 Cell-cell communication model. In the conventional Ising Model, the Hamiltonian of the system  
349 of atoms in magnetic field B can be written as a sum of energy due to interactions between the  
350 neighboring spins and the energy due to magnetic field:

351

$$352 \quad H = H_B + H_J = -B \sum_i^N s_i - \frac{J}{2} \sum_{i,j}^N s_i s_j \quad (1)$$

353

354 The probability P for the system to be in state  $\sigma$  is given by Boltzman distribution:

355

$$356 \quad P(\sigma) = \frac{e^{-\beta H(\sigma)}}{Z} \quad (2)$$

357

$$358 \quad Z = \sum_{\sigma} e^{-\beta H(\sigma)} \quad (3)$$

359

360 Where Z is the partition function of the system representing the sum of probabilities of all  
361 possible states and  $\beta$  is the inverse temperature given by  $1/k_B T$ .

362

363 For our cell communication model we choose units such that  $\beta$  is equal to 1. We consider a  
364 system of size  $N$  cells, where the external field  $B$  quantifies BMP4 concentration and the  
365 parameter  $J$  quantifies the strength of the interactions between cells. Since the parameter  $J > 0$ ,  
366 this interaction favors configurations in which neighboring cells have the same identity. We  
367 make the simplifying assumption that all cells in the  $\mu$ Colony are neighbors which is justified by  
368 the small sizes of the  $\mu$ Colonies and the extensive cell rearrangements that occur during the  
369 observation period (see Movie S1). If we take  $n$  cells to be in the CDX2+ state favored by the  
370 field  $B$ , then  $(N-n)$  cells are in the SOX2+ state and the portion of the Hamiltonian due to  
371 external ligand is given by:

$$H_B = -(Bn - (N - n)B) = -(2n - N)B \quad (4)$$

372  
373  
374  
375 The energy due to cell-cell interactions will be given by:

$$H_J = -J/2\{n(n-1)/2 + (N-n-1)(N-n)/2 - n(N-n)\} \quad (5)$$

376  
377  
378  
379 where the first two terms in the sum represent the pairs of interacting cells, that are in the same  
380 state (SOX2+ or CDX2+) and therefore contributing to  $H_J$  positively. The last term represents  
381 the interactions between the SOX2+ and CDX2+ cells and therefore contributes negatively.  
382 The total non-normalized probability for the  $\mu$ Colony to have  $n$  cells in CDX2+ state and  $(N-n)$   
383 cells in SOX2+ state is then:

$$P(n, N) = C_n^N e^{B(2n-N)} e^{J/2((N-2n)^2-N)} \quad (6)$$

384  
385  
386  
387 where  $C_n^N$  represents the number of combinations of  $n$  out of  $N$  ( $C_n^N = N!/(n!(N-n)!)$ ).

388 The partition function  $Z$  is given by:

$$Z = \sum_{states} P(n, N) = \sum_{n=0}^N C_n^N e^{B(2n-N)} e^{J/2((N-2n)^2-N)} \quad (7)$$

389  
390  
391  
392

393 These probabilities are then used to compute averages. For the results in Fig. 3, the average  
394 fraction of cells in the CDX2+ state is:

395

$$396 \quad f = \sum_{n=0}^N (n/N) \frac{P(n,N)}{Z} \quad (8)$$

397

398 To obtain the theoretical predictions to be compared to the experimental data, we repeat this  
399 calculation for all values of N. We then minimized the sum of squares differences between the  
400 model predictions and the data using a Monte-Carlo minimization algorithm coded in MATLAB.

#### 401 **Acknowledgments**

402 We thank Ali Brivanlou for providing the RUES2-GFP-Smad4 cell line and the ePB-B-CAG-  
403 RFP-Cdt1 plasmid, Eric Siggia and Daniel Wagner for comments on the manuscript, and  
404 members of the Warmflash lab for helpful discussions and feedback.

#### 405 **Competing interests**

406 The authors declare no competing or financial interests.

#### 407 **Funding**

408 This work was supported by Rice University and grants to AW from the National Science  
409 Foundation (MCB-1553228), the Cancer Research Prevention Institute of Texas (RR 140073),  
410 and the John S Dunn Foundation.

#### 411 **Data Availability**

412 Custom-written Matlab codes for image segmentation and cell tracking of  $\mu$ Colonies can be  
413 found on GitHub in repository warmflasha/CellTracker and warmflasha/CellTracker60X.

#### 414 **References**

415 **Arnold, S. J. and Robertson, E. J.** (2009). Making a commitment: cell lineage allocation and  
416 axis patterning in the early mouse embryo. *Nat Rev Mol Cell Biol* **10**, 91–103.

417 **Berge, ten, D., Koole, W., Fuerer, C., Fish, M., Eroglu, E. and Nusse, R.** (2008). Wnt  
418 signaling mediates self-organization and axis formation in embryoid bodies. *Cell Stem Cell*  
419 **3**, 508–518.

420 **Bernardo, A. S., Faial, T., Gardner, L., Niakan, K. K., Ortmann, D., Senner, C. E., Callery,  
421 E. M., Trotter, M. W., Hemberger, M., Smith, J. C., et al.** (2011). BRACHYURY and  
422 CDX2 mediate BMP-induced differentiation of human and mouse pluripotent stem cells into



- 423 embryonic and extraembryonic lineages. *Cell Stem Cell* **9**, 144–155.
- 424 **Bier, E. and De Robertis, E. M.** (2015). EMBRYO DEVELOPMENT. BMP gradients: A  
425 paradigm for morphogen-mediated developmental patterning. *Science* **348**, aaa5838–  
426 aaa5838.
- 427 **Bolouri, H. and Davidson, E. H.** (2010). The gene regulatory network basis of the “community  
428 effect,” and analysis of a sea urchin embryo example. *Dev Biol* **340**, 170–178.
- 429 **Deglincerti, A., Etoc, F., Guerra, M. C., Martyn, I., Metzger, J., Ruzo, A., Simunovic, M.,  
430 Yoney, A., Brivanlou, A. H., Siggia, E., et al.** (2016). Self-organization of human  
431 embryonic stem cells on micropatterns. *Nat Protoc* **11**, 2223–2232.
- 432 **Dunn, N. R., Vincent, S. D., Oxburgh, L., Robertson, E. J. and Bikoff, E. K.** (2004).  
433 Combinatorial activities of Smad2 and Smad3 regulate mesoderm formation and patterning  
434 in the mouse embryo. *Development* **131**, 1717–1728.
- 435 **Etoc, F., Metzger, J., Ruzo, A., Kirst, C., Yoney, A., Ozair, M. Z., Brivanlou, A. H. and  
436 Siggia, E. D.** (2016). A Balance between Secreted Inhibitors and Edge Sensing Controls  
437 Gastruloid Self-Organization. *Dev Cell*.
- 438 **Ferguson, E. L. and Anderson, K. V.** (1992). Decapentaplegic acts as a morphogen to organize  
439 dorsal-ventral pattern in the *Drosophila* embryo. *Cell* **71**, 451–461.
- 440 **Gurdon, J. B.** (1988). A community effect in animal development. *Nature* **336**, 772–774.
- 441 **Horii, M., Li, Y., Wakeland, A. K., Pizzo, D. P., Nelson, K. K., Sabatini, K., Laurent, L. C.,  
442 Liu, Y. and Parast, M. M.** (2016). Human pluripotent stem cells as a model of trophoblast  
443 differentiation in both normal development and disease. *Proc Natl Acad Sci USA*  
444 201604747.
- 445 **Karaulanov, E., Knöchel, W. and Niehrs, C.** (2004). Transcriptional regulation of BMP4  
446 synexpression in transgenic *Xenopus*. *EMBO J* **23**, 844–856.
- 447 **Kurek, D., Neagu, A., Tastemel, M., Tüysüz, N., Lehmann, J., van de Werken, H. J. G.,  
448 Philipsen, S., van der Linden, R., Maas, A., van IJcken, W. F. J., et al.** (2015).  
449 Endogenous WNT Signals Mediate BMP-Induced and Spontaneous Differentiation of  
450 Epiblast Stem Cells and Human Embryonic Stem Cells. *Stem Cell Reports* **4**, 114–128.
- 451 **Li, Y. and Parast, M. M.** (2014). BMP4 regulation of human trophoblast development. *Int. J.*  
452 *Dev. Biol.* **58**, 239–246.
- 453 **Li, Y., Moretto-Zita, M., Soncin, F., Wakeland, A., Wolfe, L., Leon-Garcia, S., Pandian, R.,  
454 Pizzo, D., Cui, L., Nazor, K., et al.** (2013). BMP4-directed trophoblast differentiation of  
455 human embryonic stem cells is mediated through a  $\Delta$ Np63<sup>+</sup> cytotrophoblast stem cell state.  
456 *Development* **140**, 3965–3976.
- 457 **Robertson, E. J.** (2014). Dose-dependent Nodal/Smad signals pattern the early mouse embryo.

- 458 *Semin Cell Dev Biol* **32**, 73–79.
- 459 **Sakaue-Sawano, A., Kurokawa, H., Morimura, T., Hanyu, A., Hama, H., Osawa, H.,**  
460 **Kashiwagi, S., Fukami, K., Miyata, T., Miyoshi, H., et al.** (2008). Visualizing  
461 spatiotemporal dynamics of multicellular cell-cycle progression. *Cell* **132**, 487–498.
- 462 **Schmierer, B. and Hill, C. S.** (2005). Kinetic analysis of Smad nucleocytoplasmic shuttling  
463 reveals a mechanism for transforming growth factor beta-dependent nuclear accumulation of  
464 Smads. *Mol Cell Biol* **25**, 9845–9858.
- 465 **Schuler-Metz, A., Knöchel, S., Kaufmann, E. and Knöchel, W.** (2000). The homeodomain  
466 transcription factor Xvent-2 mediates autocatalytic regulation of BMP-4 expression in  
467 *Xenopus* embryos. *J Biol Chem* **275**, 34365–34374.
- 468 **Sorre, B., Warmflash, A., Brivanlou, A. H. and Siggia, E. D.** (2014). Encoding of temporal  
469 signals by the TGF- $\beta$  pathway and implications for embryonic patterning. *Dev Cell* **30**, 334–  
470 342.
- 471 **Tang, C., Ardehali, R., Rinkevich, Y., Seita, J., Lee, A. S., Mosley, A. R., Drukker, M.,**  
472 **Weissman, I. L. and Soen, Y.** (2012). Isolation of primitive endoderm, mesoderm, vascular  
473 endothelial and trophoblast progenitors from human pluripotent stem cells. *Nat Biotechnol*  
474 **30**, 531–542.
- 475 **Tucker, J. A., Mintzer, K. A. and Mullins, M. C.** (2008). The BMP signaling gradient patterns  
476 dorsoventral tissues in a temporally progressive manner along the anteroposterior axis. *Dev*  
477 *Cell* **14**, 108–119.
- 478 **van den Brink, S. C., Baillie-Johnson, P., Balayo, T., Hadjantonakis, A.-K., Nowotschin, S.,**  
479 **Turner, D. A. and Martinez Arias, A.** (2014). Symmetry breaking, germ layer  
480 specification and axial organisation in aggregates of mouse embryonic stem cells.  
481 *Development* **141**, 4231–4242.
- 482 **Warmflash, A., Sorre, B., Etoc, F., Siggia, E. D. and Brivanlou, A. H.** (2014). A method to  
483 recapitulate early embryonic spatial patterning in human embryonic stem cells. *Nat Meth* **11**,  
484 847–854.
- 485 **Warmflash, A., Zhang, Q., Sorre, B., Vonica, A., Siggia, E. D. and Brivanlou, A. H.** (2012).  
486 Dynamics of TGF- $\beta$  signaling reveal adaptive and pulsatile behaviors reflected in the nuclear  
487 localization of transcription factor Smad4. *Proc Natl Acad Sci USA* **109**, E1947–56.
- 488 **Wilson, P. A., Lagna, G., Suzuki, A. and Hemmati-Brivanlou, A.** (1997). Concentration-  
489 dependent patterning of the *Xenopus* ectoderm by BMP4 and its signal transducer Smad1.  
490 *Development* **124**, 3177–3184.
- 491 **Winnier, G., Blessing, M., Labosky, P. A. and Hogan, B. L.** (1995). Bone morphogenetic  
492 protein-4 is required for mesoderm formation and patterning in the mouse. *Genes Dev* **9**,  
493 2105–2116.

494 **Xu, R.-H., Chen, X., Li, D. S., Li, R., Addicks, G. C., Glennon, C., Zwaka, T. P. and**  
495 **Thomson, J. A.** (2002). BMP4 initiates human embryonic stem cell differentiation to  
496 trophoblast. *Nat Biotechnol* **20**, 1261–1264.

497 **Yu, P., Pan, G., Yu, J. and Thomson, J. A.** (2011). FGF2 sustains NANOG and switches the  
498 outcome of BMP4-induced human embryonic stem cell differentiation. *Cell Stem Cell* **8**,  
499 326–334.

500

## 501 **Figure legends**

### 502 **Figure 1. BMP causes differentiation of $\mu$ Colonies to a single fate with a sharp threshold.**

503 (A) Representative image of stem cells in  $\mu$ Colonies. (B) Representative distribution of colony  
504 sizes. (C) Fractions of SOX2, CDX2 or BRA positive cells upon differentiation with BMP4 for  
505 42 hours. (D) Example images of immunofluorescence for CDX2 and SOX2 at the indicated  
506 BMP4 doses. (E) Scatter plots of SOX2 versus CDX2 markers for indicated BMP4  
507 concentrations. Each dot corresponds to a single cell while the color code indicates the size of  
508 the colony containing that cell. Scale bars 50  $\mu$ m. See also Fig. S1 and S2.

### 509 **Figure 2. In standard culture, treatment with BMP4 reveals a morphogen effect that**

510 **depends on Nodal signaling and cell density.** (A) Representative images showing SOX2,  
511 CDX2 and BRA differentiation in response to two doses of BMP4. Scale bar 50  $\mu$ m. (B-C) Mean  
512 expression of SOX2, BRA and CDX2 markers as a function of BMP4 concentrations with (C)  
513 and without (B) 10 $\mu$ m SB431542. The values in (B) and (C) are normalized to the maximum  
514 over both sets which were performed in the same experiment. (D-E) Mean expression of SOX2,  
515 BRA and CDX2 markers after differentiation with 2 (D) or 10 (E) ng/ml BMP4 with varied  
516 initial seeding density. The values in (D) and (E) are normalized to the maximum over the two  
517 sets which were performed in the same experiment. Dotted lines represent the levels of  
518 expression of the indicated marker under pluripotency conditions. All differentiation  
519 experiments were conducted for 42 hours. See also Fig. S3.

### 520 **Figure 3. A community effect enforces a common fate in $\mu$ Colonies.** (A) Representative

521 image demonstrating the community effect in differentiated conditions (1 ng/ml BMP4). Scale  
522 bar 50  $\mu$ m. (B) Distributions of SOX2 and CDX2 expression in cells of one- and seven-cell  
523 colonies in undifferentiated conditions. (C) The fraction of cells expressing a given gene is  
524 shown with fits to the Ising-like model. Error bars represent the standard deviation over at least  
525 three biological replicates. See also Fig. S4-S7.

526 **Figure 4. The cell cycle does not regulate the community effect.** Mean total DNA content (A)  
527 and fraction of cells in the G1 phase of the cell cycle (B) as a function of colony size. In (A) the  
528 error bars represent the standard error of the mean calculated separately for each colony size. For  
529 (B) the error bars were calculated using bootstrapping method.

530 **Figure 5. Reinforcement of the BMP signal underlies the community effect in differentiated**  
531 **cells.** (A) Representative images of reporter cells. Scale bar 10  $\mu\text{m}$  (see Movie S1). (B)  
532 Representative trajectories for the one- and two-cell colonies treated with 10 ng/ml BMP4. (C)  
533 Mean signaling trajectories for one and two cell colonies. (D) –(F) Histograms of mean signaling  
534 intensity in individual cells over the indicated time intervals. (G) Cells were classified as high or  
535 low expressing for CDX2. The mean signaling is shown in each case. (H) Signaling trajectories  
536 were similarly binarized as high or low signaling and the fraction of cells with high or low  
537 CDX2 examined as function of the signaling level. Due to difficulty tracking individual cells for  
538 42 hours, cells were fixed and analyzed for CDX2 after 24 hours in BMP4. In panels (C) and (H)  
539 error bars represent standard error of the mean over trajectories.

540 **Figure 6. Cells fates correlate with the duration of signaling rather than initial response to**  
541 **BMP4.** (A) Representative images of reporter cells in standard culture conditions at the indicated  
542 time points following BMP4 treatment. Scale bar 20  $\mu\text{m}$ . Images were acquired every 20  
543 minutes. (B) Mean signaling trajectories for cells continuously stimulated with indicated doses of  
544 BMP4. (C) Levels of CDX2 after 40 hours of differentiation. Immediately after the live cell  
545 imaging was completed, cells were fixed and stained for CDX2. Error bars were calculated using  
546 bootstrapping.

547

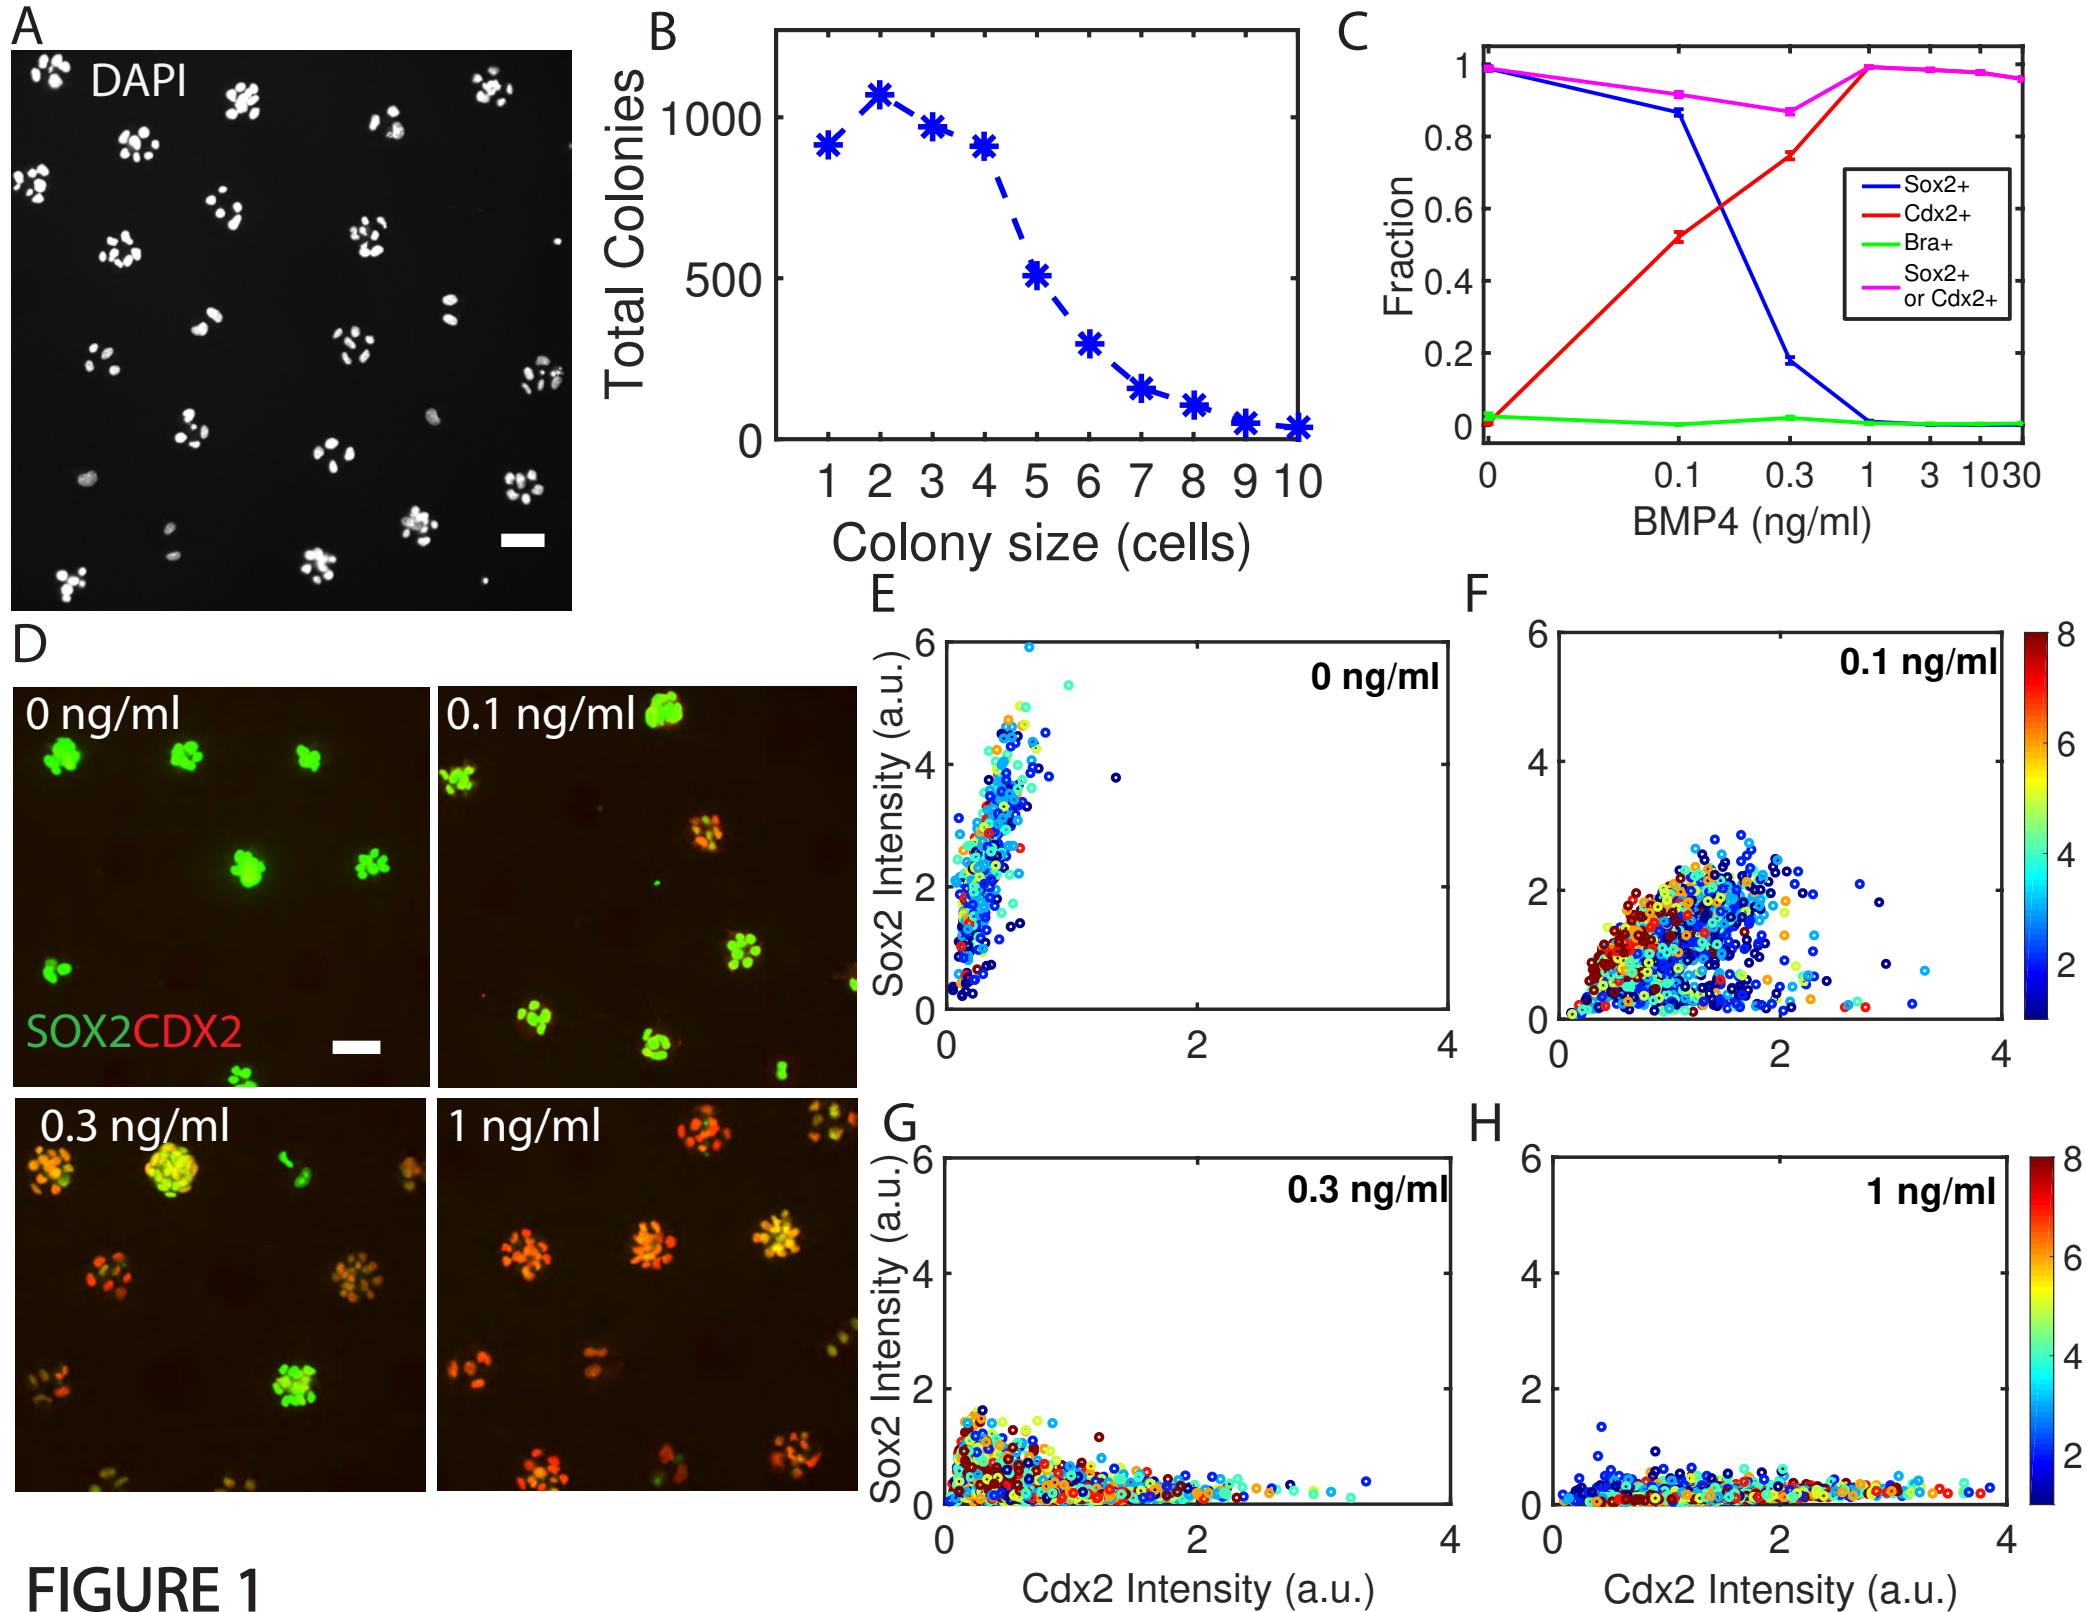

**FIGURE 1**

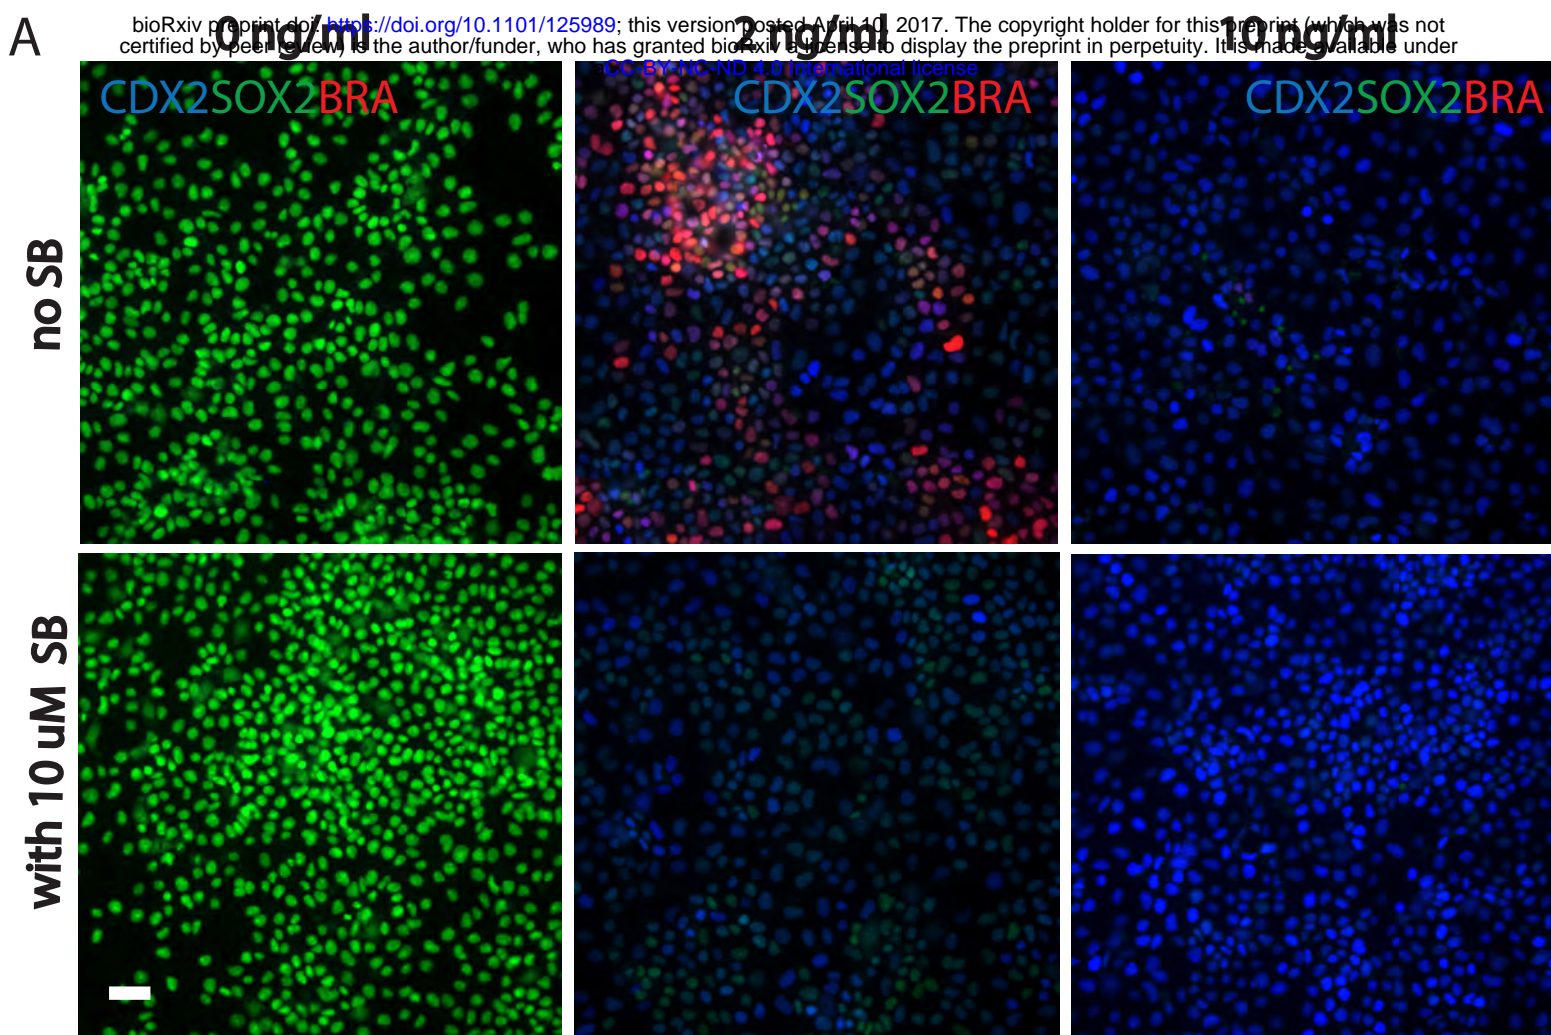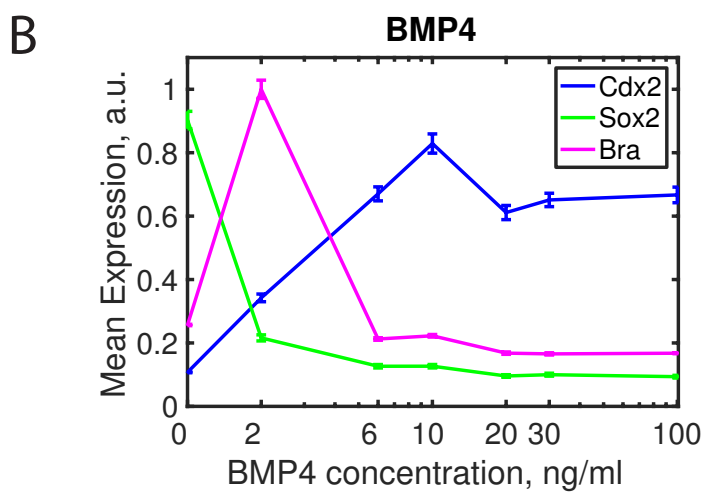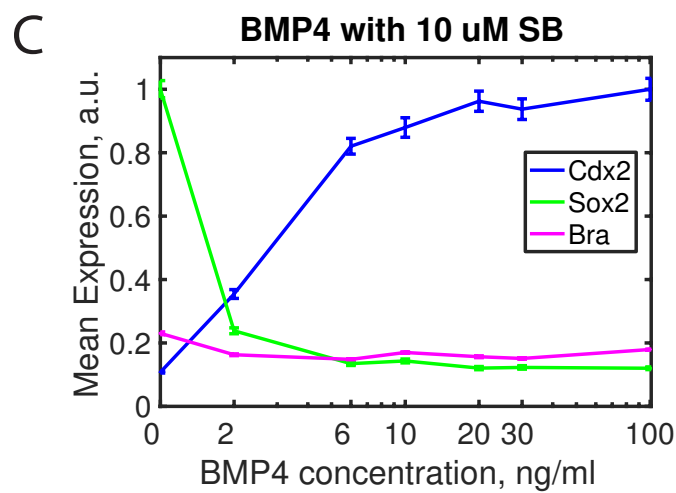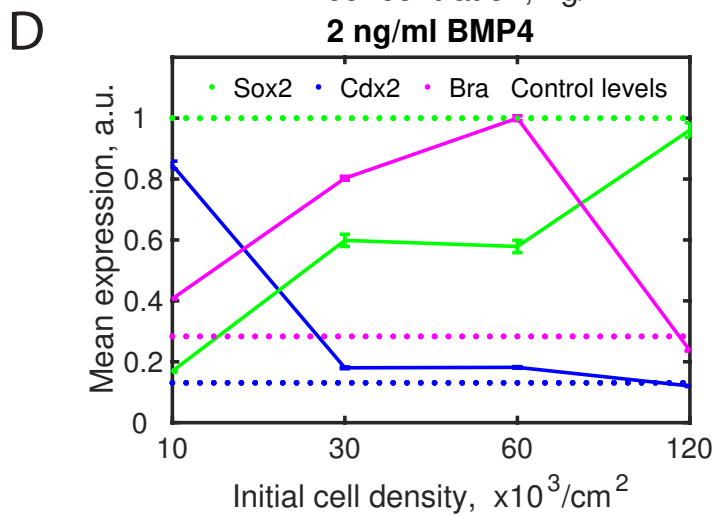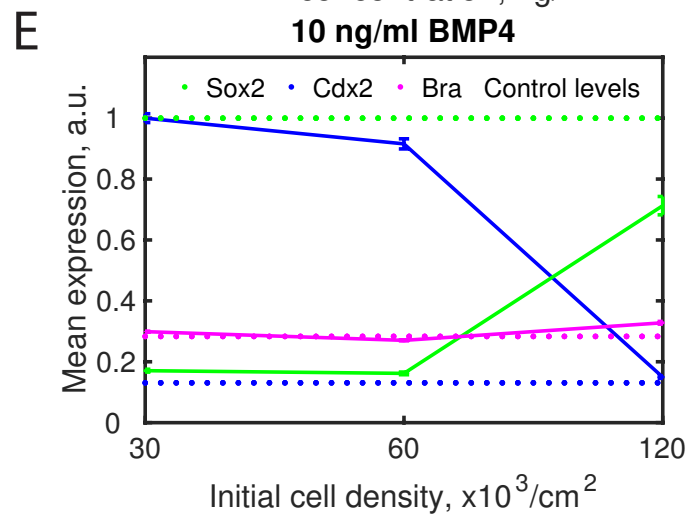

**FIGURE 2**

FIGURE 3

A

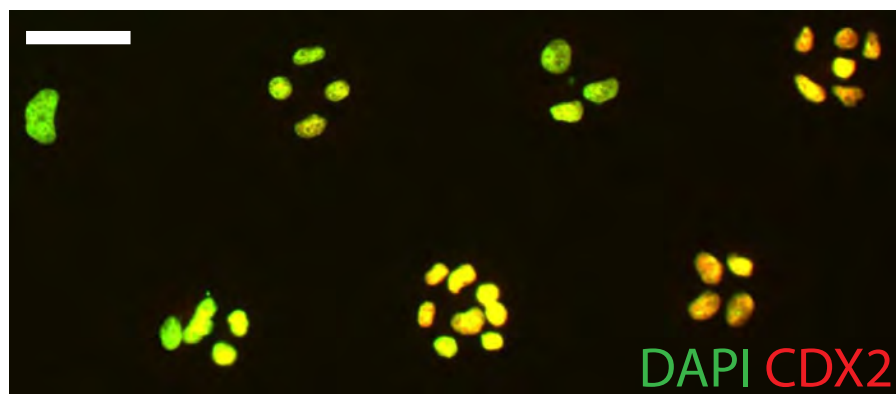

B

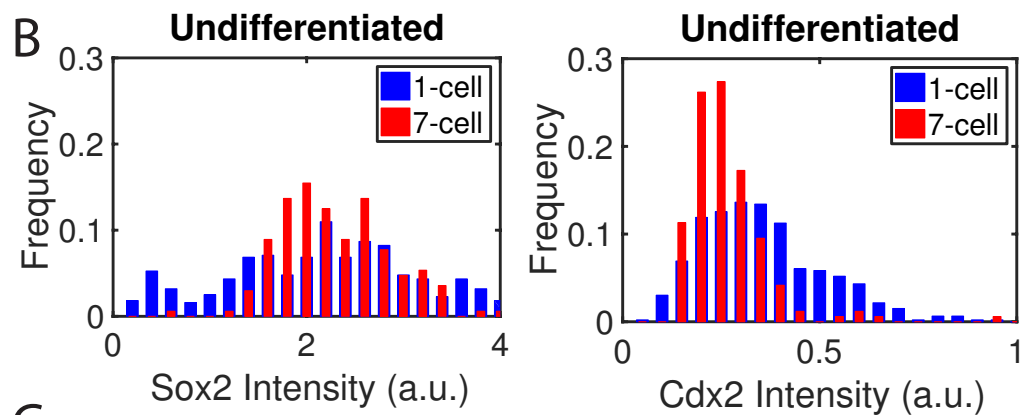

C

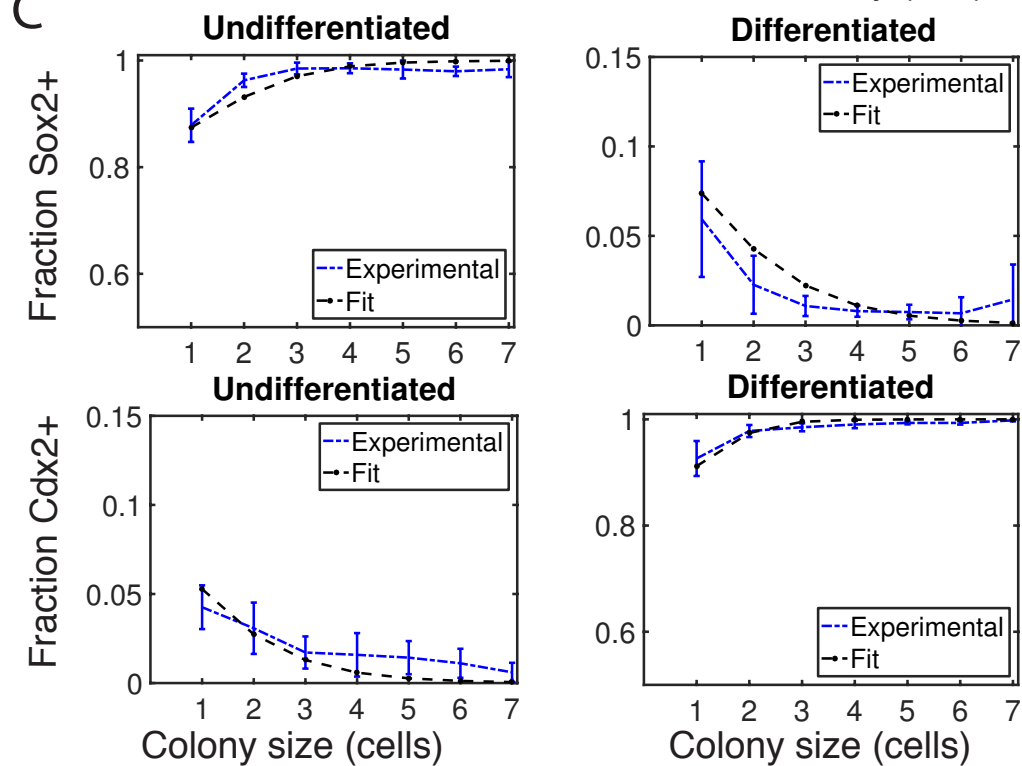

A

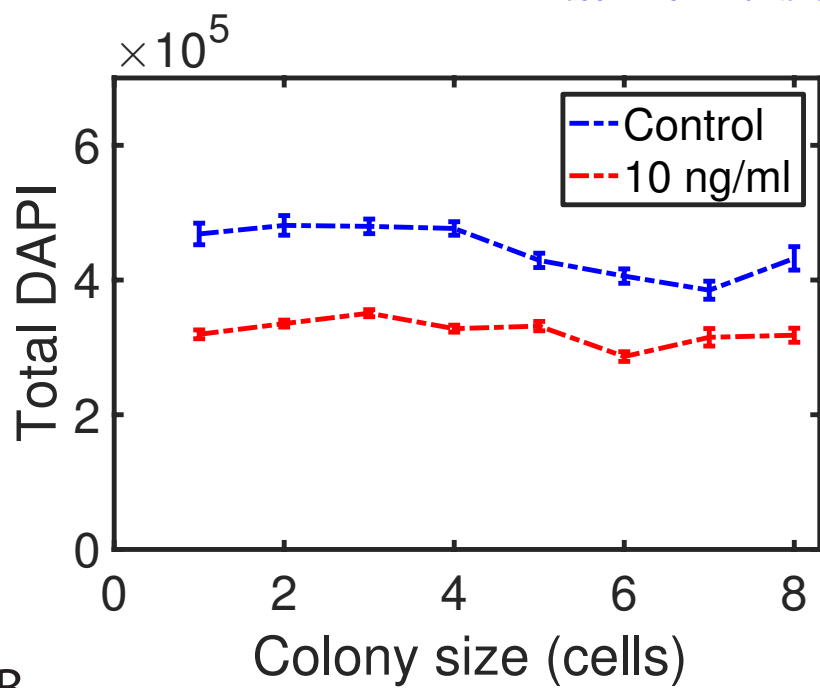

B

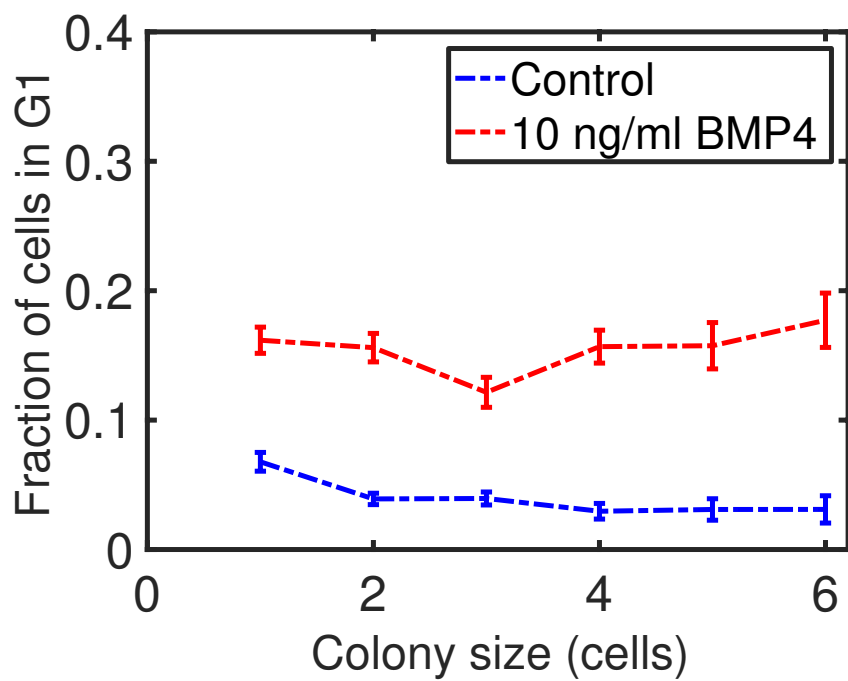

FIGURE 4



FIGURE 5

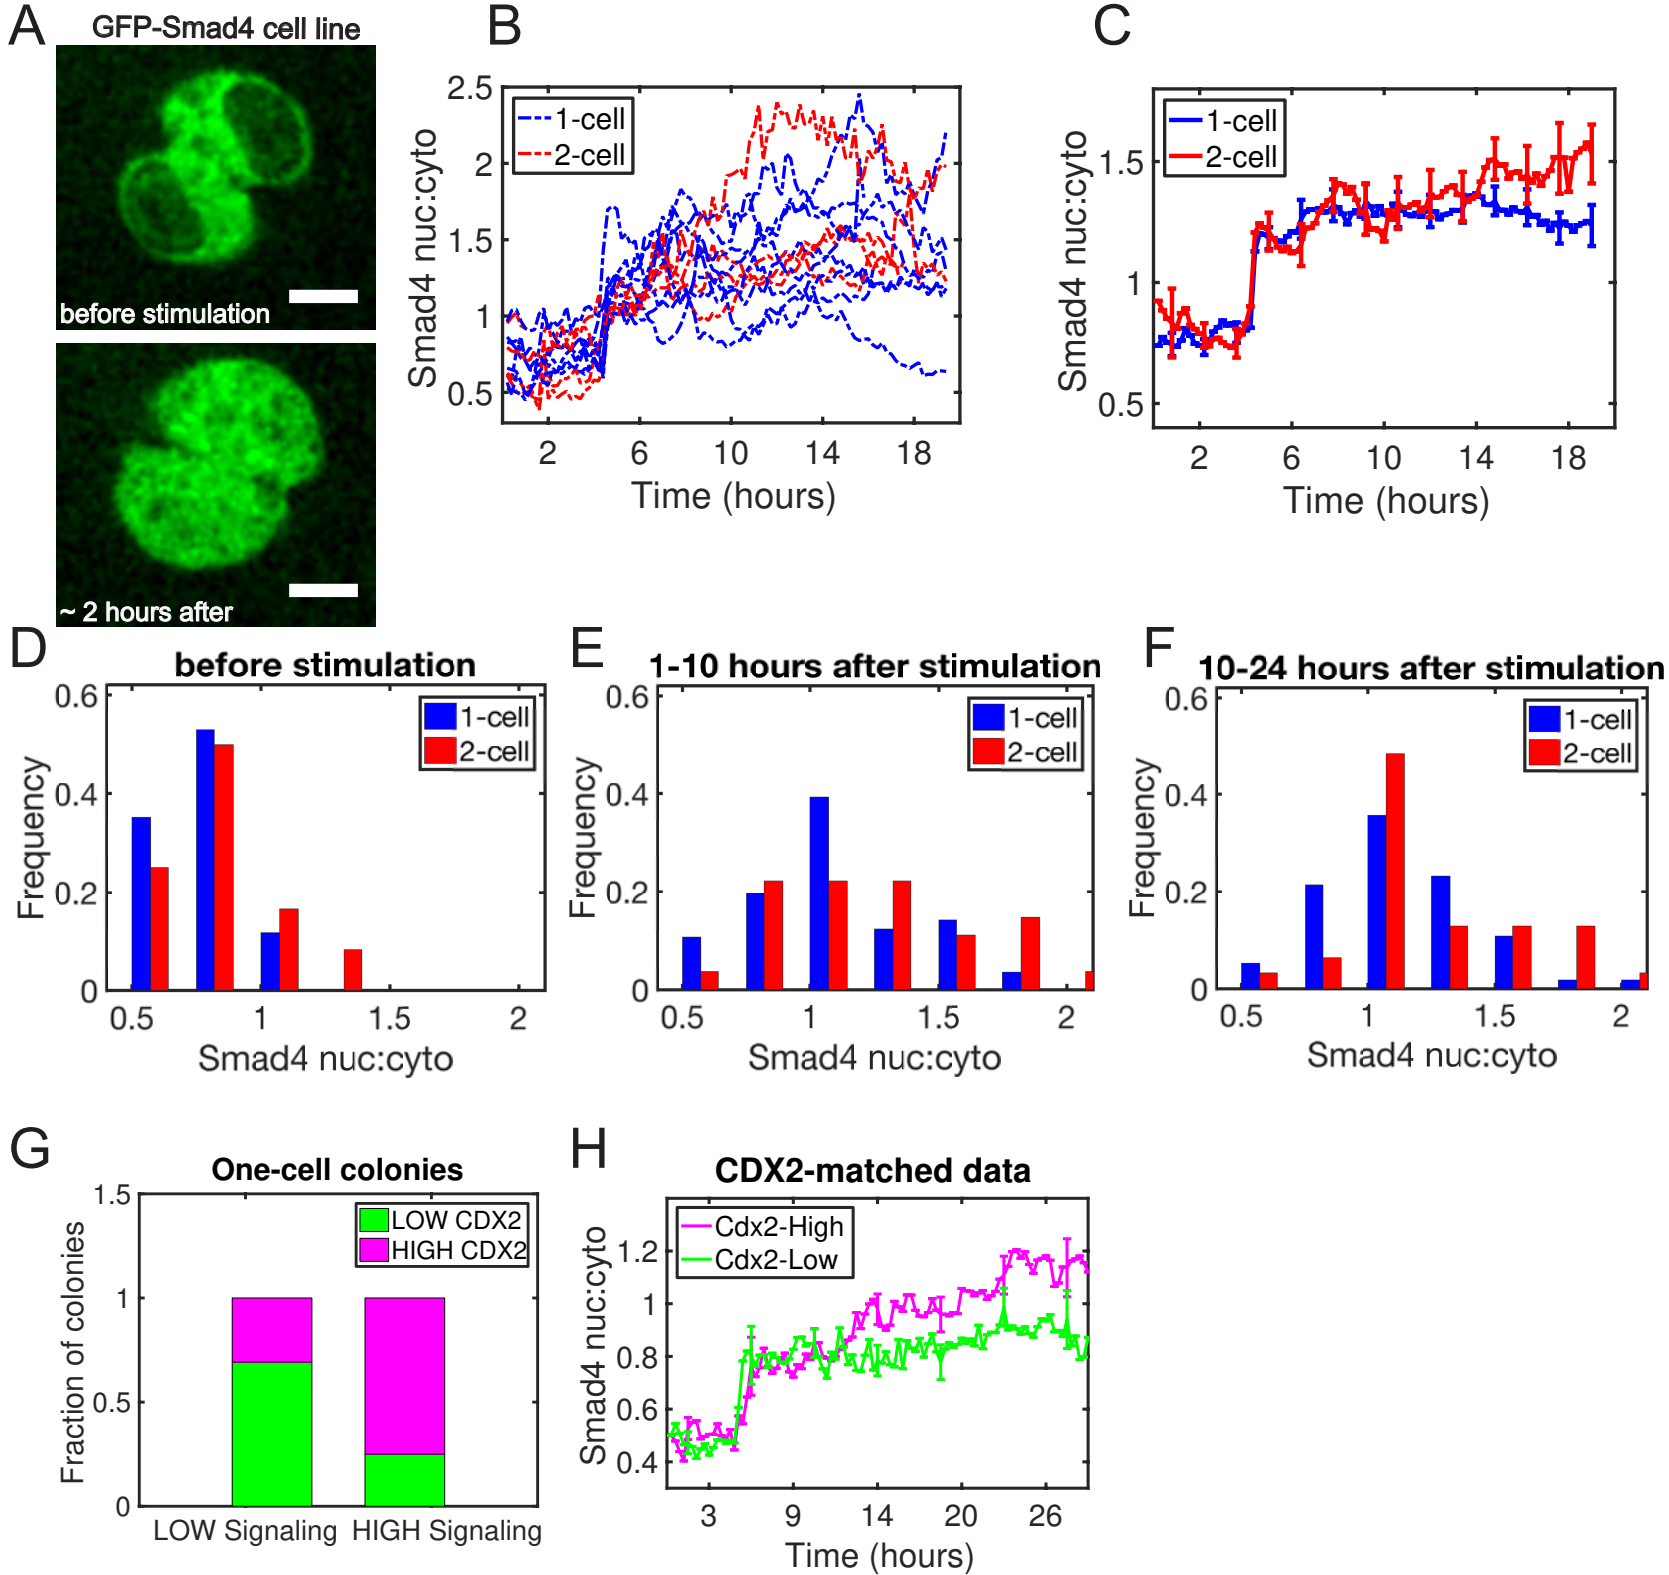

A

before stimulation

1 hr after stimulation

30 hours in BMP4

1 ng/ml

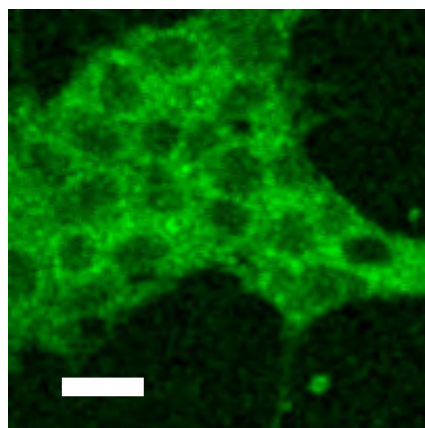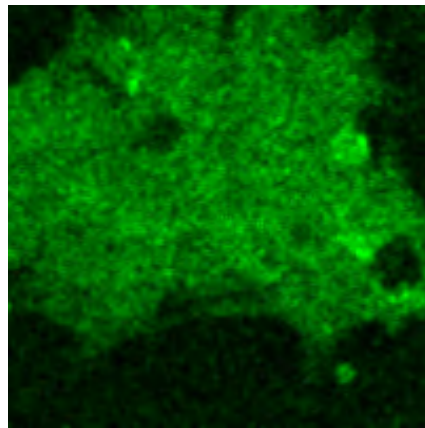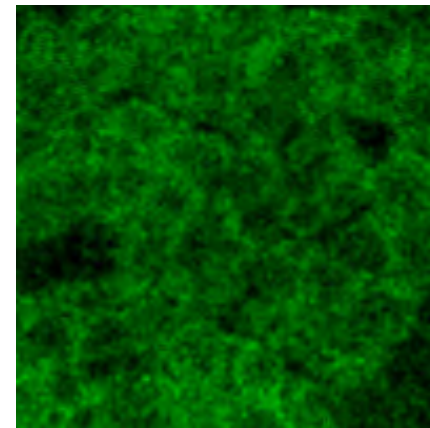

10 ng/ml

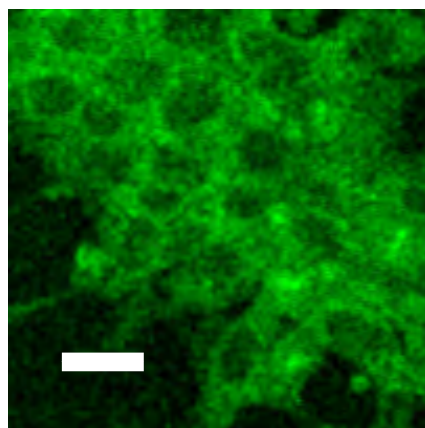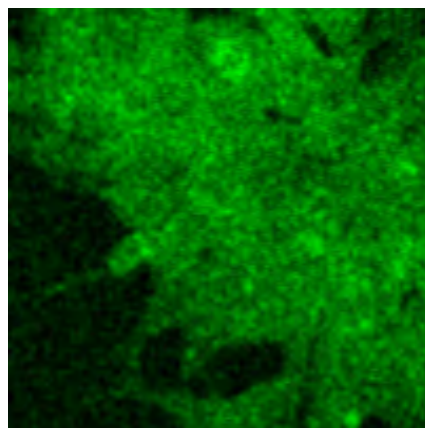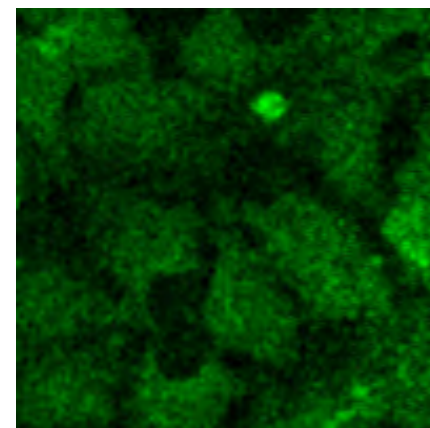

B

With 10  $\mu$ M SB

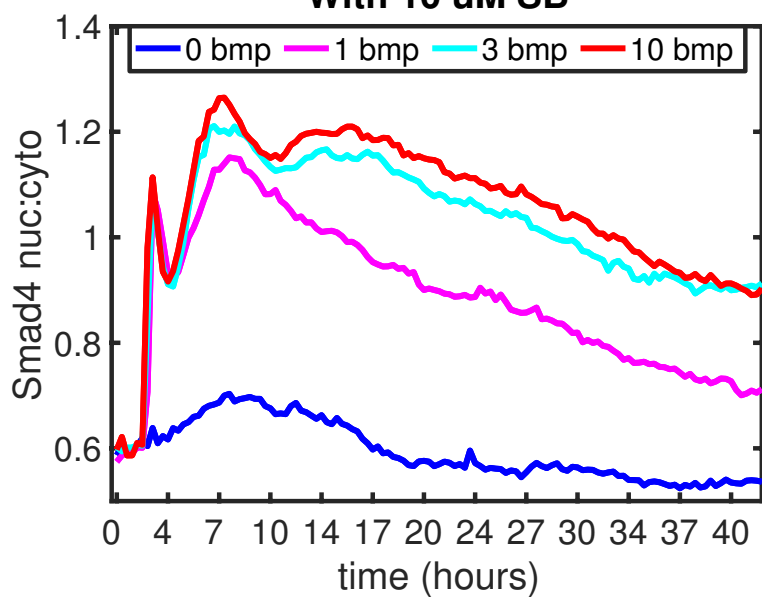

C

BMP4 with 10  $\mu$ M SB

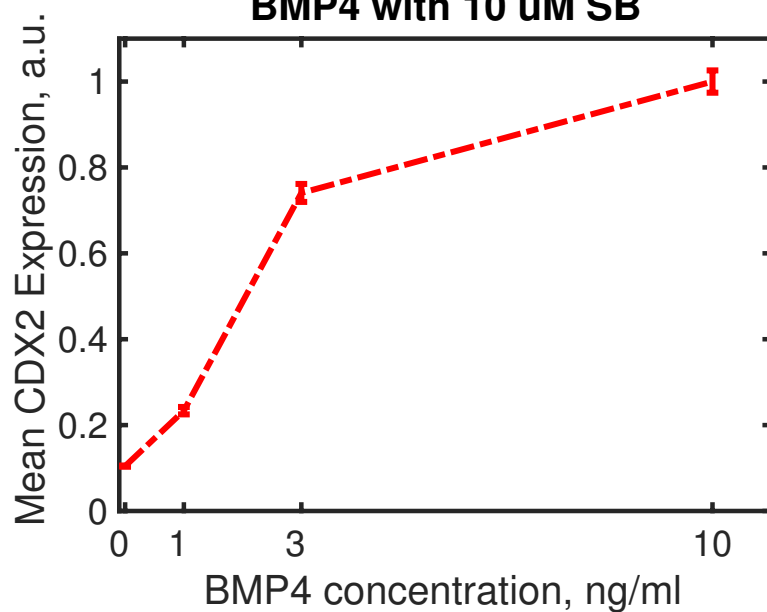

FIGURE 6
